# Supplementary material for: Theoretical insight into the binding affinity enhancement of serine with the uranyl ion through phosphorylation
Source: Royal Society of Chemistry journal article supplement (doi:10.1039/c6ra14906e), 2016-01-01
Supplement: c6ra14906e1.pdf [file c6ra14906e1.pdf]

## Electronic Supplementary Information

Theoretical Insight into the Binding Affinity Enhancement of Serine  
with the Uranyl Ion through Phosphorylation

Qun-Yan Wu,<sup>†</sup> Jian-Hui Lan,<sup>†</sup> Cong-Zhi Wang,<sup>†</sup> Zhi-Fang Chai,<sup>†‡</sup> and  
Wei-Qun Shi<sup>\*†</sup>

<sup>†</sup>Laboratory of Nuclear Energy Chemistry and Key Laboratory for Biomedical Effects  
of Nanomaterials and Nanosafety, Institute of High Energy Physics, Chinese  
Academy of Sciences, Beijing, 100049, China

<sup>‡</sup>School of Radiological and Interdisciplinary Sciences (RAD-X), and Collaborative  
Innovation Center of Radiation Medicine of Jiangsu Higher Education Institutions,  
Soochow University, Suzhou 215123, China

### Corresponding Author

\*E-mail: shiwq@ihep.ac.cn, Tel: 86-10-88233968.

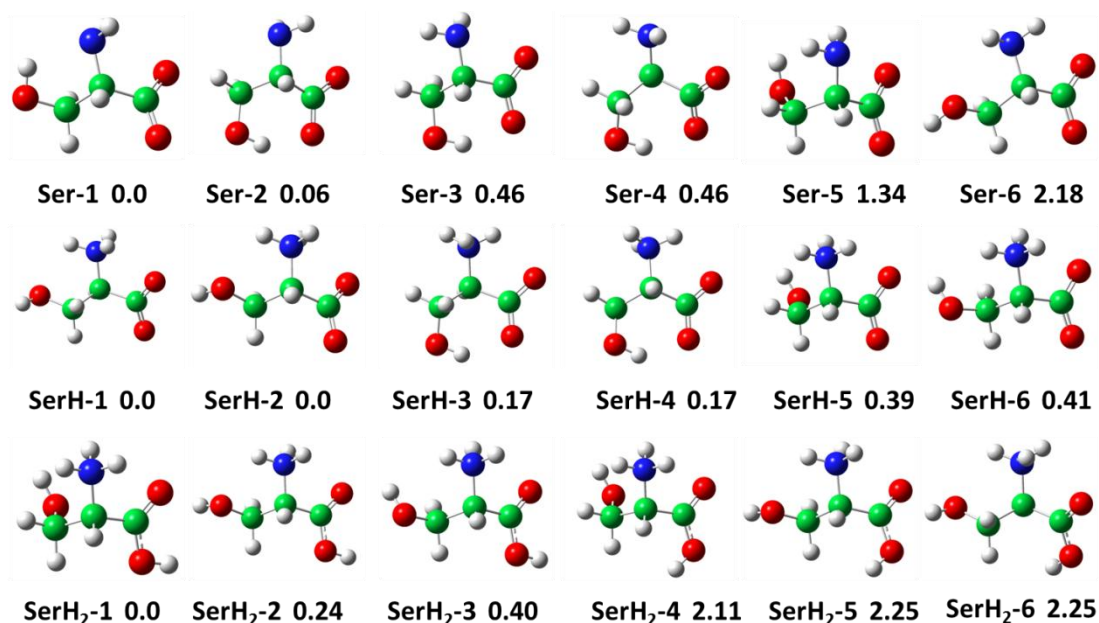

**Fig. S1.** Structures of the most stable protonated (cation, SerH<sub>2</sub>), zwitterionic (neutral, SerH) and deprotonated (anion, Ser) serine optimized in the aqueous phase at the B3LYP/6-311+G(d)/SMD level of theory. Relative energies (kcal/mol) are provided at the same level of theory. H, C, N and O atoms are represented by white, green, blue and red spheres, respectively.

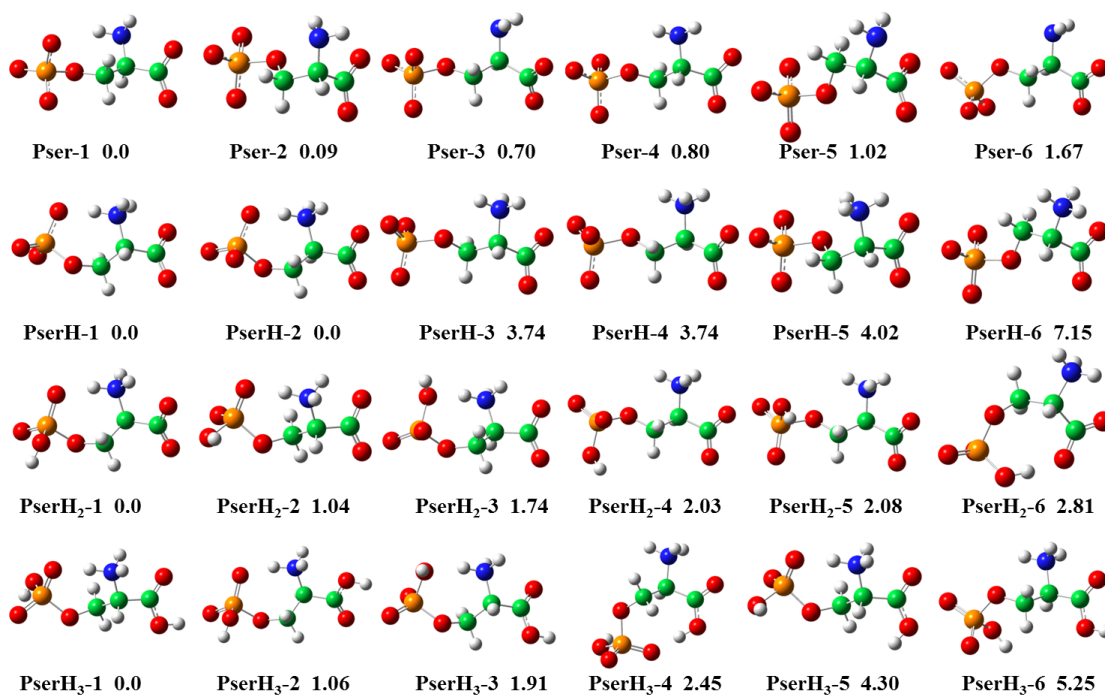

**Fig. S2.** Structures of the most stable neutral (pSerH<sub>3</sub>), mono-anionic (pSerH<sub>2</sub><sup>-</sup>), di-anionic (pSerH<sup>2-</sup>) and tri-anionic (pSer<sup>3-</sup>) phosphoserine optimized in the aqueous phase at the B3LYP/6-311+G(d)/SMD level of theory. Relative energies (kcal/mol) are provided at the same level of theory. H, C, N, O and P atoms are represented by white, green, blue, red and orange spheres, respectively.

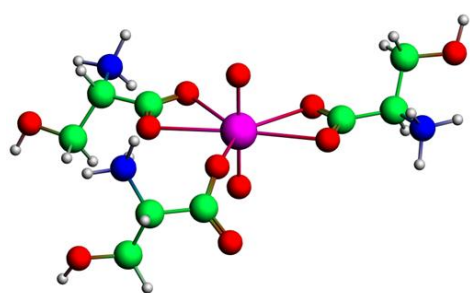

$[\text{UO}_2(\text{SerH})_3]^{2+-1}$  0.0

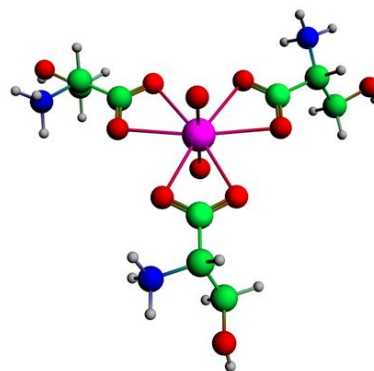

$[\text{UO}_2(\text{SerH})_3]^{2+-2}$  0.79

**Fig. S3.** Structures of the 1:3 type complexes of uranyl ion with zwitterionic (SerH) serine optimized at the B3LYP/ECP60MWB-SEG/6-311+G(d)/SMD level of theory in the aqueous phase. H, C, N, O and U atoms are represented by white, green, blue, red and purple spheres, respectively.

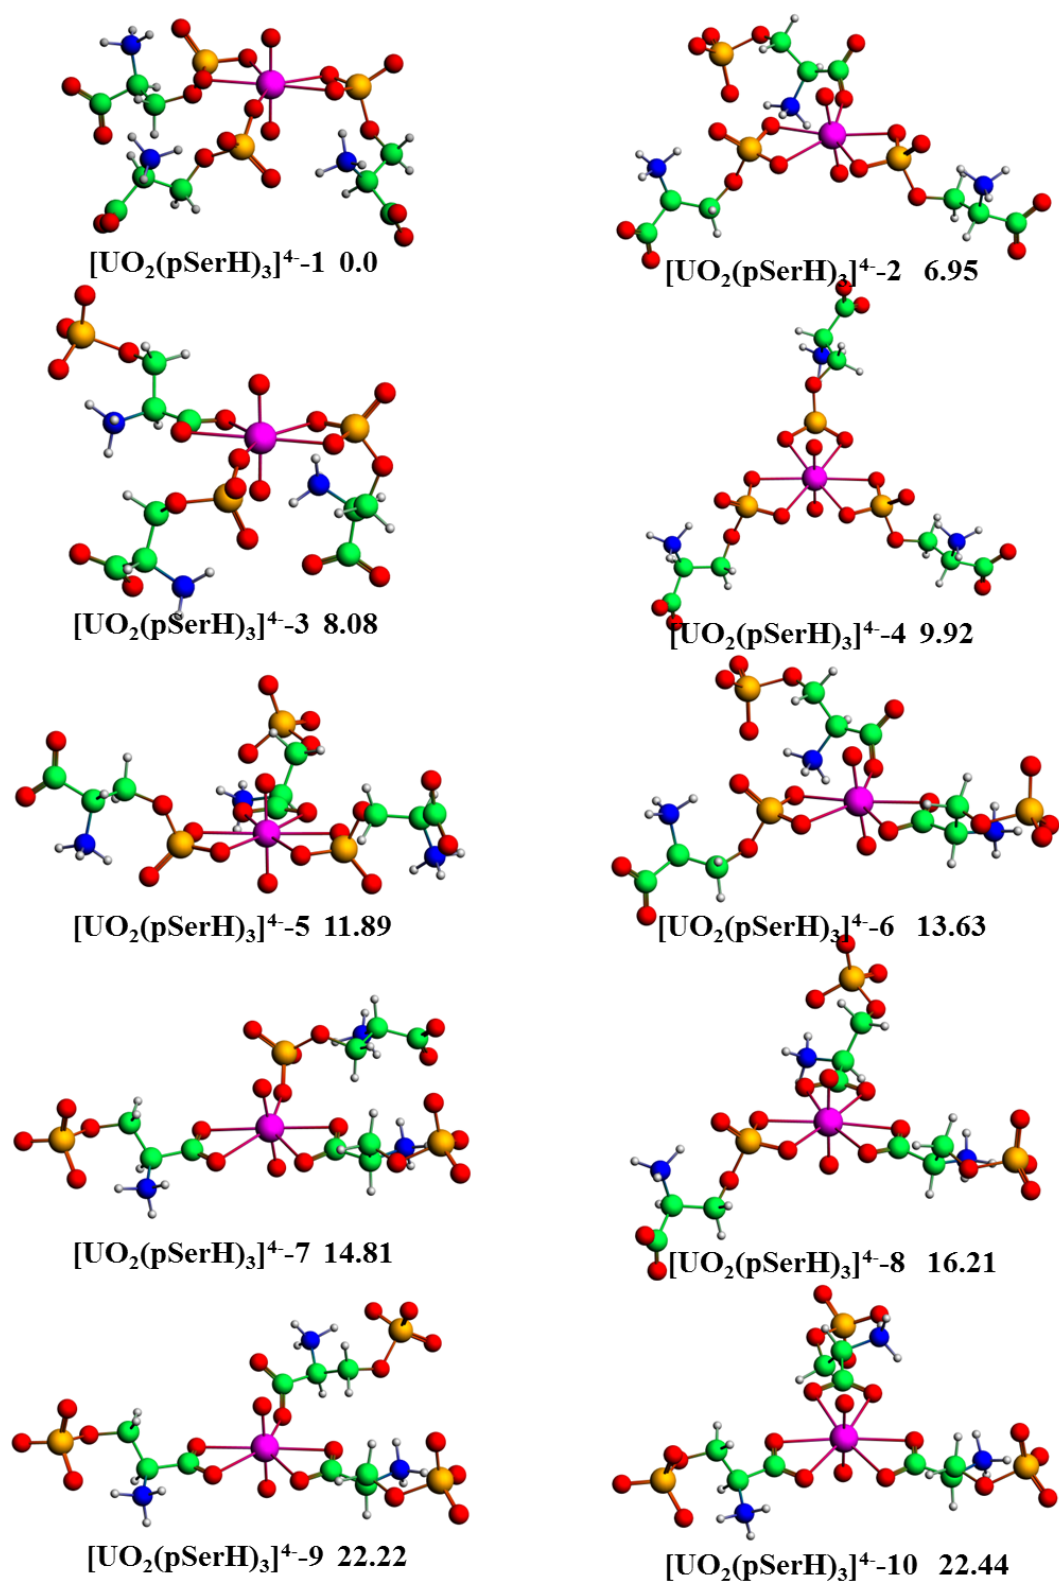

**Fig. S4.** Structures of the 1:3 type complexes of uranyl ion with dianionic phosphoserine ( $\text{pSerH}^{2-}$ ) optimized in the aqueous phase at the B3LYP/ECP60MWB-SEG/6-311+G(d)/SMD level of theory. H, C, N, O, P and U atoms are represented by white, green, blue, red, orange and purple spheres, respectively.

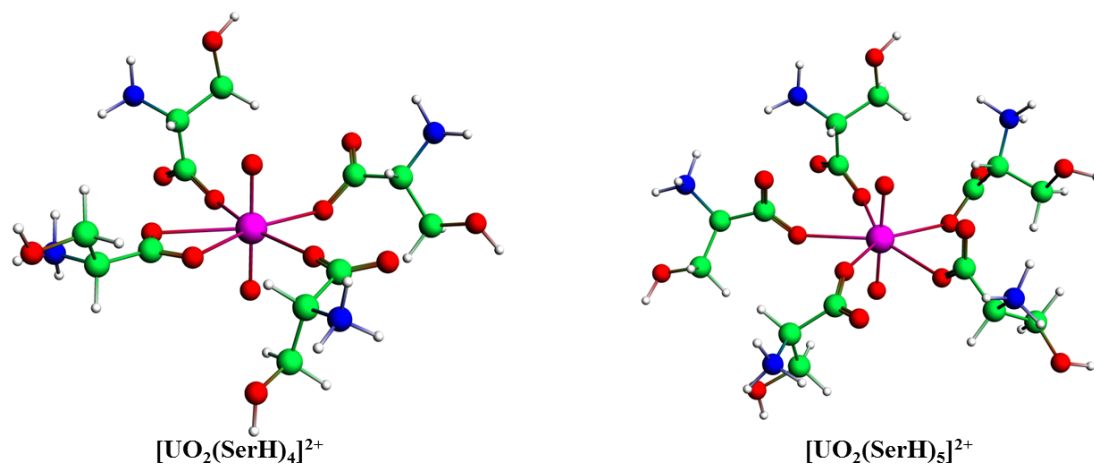

**Fig. S5.** Structures of the 1:4 and 1:5 type complexes of uranyl ion with zwitterionic (SerH) serine optimized at the B3LYP/ECP60MWB-SEG/6-311+G(d)/SMD level of theory in the aqueous phase. H, C, N, O and U atoms are represented by white, green, blue, red and purple spheres, respectively.

**Table S1.** Average U-O bond distances (Å), O=U=O angles (degree) and the  $\text{UO}_2^{2+}$  harmonic vibrational frequencies ( $\nu_s$  and  $\nu_{as}$ ,  $\text{cm}^{-1}$ ) for the  $[\text{UO}_2(\text{H}_2\text{O})_3]^{+2}$  complex optimized in the aqueous solution at the different level of theory.

| Level of theory         | U=O   | U-O <sub>C</sub> | U-O <sub>W</sub> | $\angle\text{O}=\text{U}=\text{O}$ | $\nu_s$ | $\nu_{as}$ |
|-------------------------|-------|------------------|------------------|------------------------------------|---------|------------|
| B3LYP/6-311+G(d)/SMD    | 1.770 | 2.561            | 2.490            | 178.75                             | 865     | 906        |
| B3LYP/6-31+G(d)/SMD     | 1.772 | 2.537            | 2.514            | 178.68                             | 876     | 920        |
| B3LYP-D3/6-311+G(d)/SMD | 1.769 | 2.544            | 2.491            | 178.74                             | 867     | 908        |
| B3LYP-D3/6-31+G(d)/SMD  | 1.771 | 2.519            | 2.518            | 178.60                             | 878     | 922        |
| BP86/6-311+G(d)/SMD     | 1.796 | 2.531            | 2.477            | 178.35                             | 814     | 867        |
| BP86/6-31+G(d)/SMD      | 1.797 | 2.504            | 2.502            | 178.01                             | 824     | 879        |
| PBE/6-311+G(d)/SMD      | 1.791 | 2.530            | 2.480            | 178.32                             | 820     | 873        |
| PBE/6-31+G(d)/SMD       | 1.793 | 2.503            | 2.506            | 177.98                             | 830     | 885        |
| M06/6-311+G(d)/SMD      | 1.741 | 2.569            | 2.481            | 178.87                             | 909     | 936        |
| M06/6-31+G(d)/SMD       | 1.744 | 2.551            | 2.504            | 178.84                             | 919     | 952        |

**Table S2.** Electron Density ( $\rho$ , au) of U-O Bond Critical Point and Its Laplacian ( $\nabla^2\rho$ , au) as well as Wiberg Bond Indices (WBIs) of U-O bonds for the 1:2 Type Complexes at the B3LYP/ECP60MWB-SEG/6-311+G(d) Level of Theory.<sup>a</sup>

| Complexes                                                  | U-O <sub>C</sub> |                |       | U-O <sub>P</sub> |                |       | U-O <sub>W</sub> |                |       |
|------------------------------------------------------------|------------------|----------------|-------|------------------|----------------|-------|------------------|----------------|-------|
|                                                            | $\rho$           | $\nabla^2\rho$ | WBIs  | $\rho$           | $\nabla^2\rho$ | WBIs  | $\rho$           | $\nabla^2\rho$ | WBIs  |
| $[\text{UO}_2(\text{SerH})_2(\text{H}_2\text{O})]^{2+}-1$  | 0.048            | 0.157          | 0.368 | -                | -              | -     | 0.052            | 0.203          | 0.403 |
| $[\text{UO}_2(\text{SerH})_2(\text{H}_2\text{O})]^{2+}-2$  | 0.048            | 0.157          | 0.367 | -                | -              | -     | 0.054            | 0.214          | 0.413 |
| $[\text{UO}_2(\text{pSerH}_2)_2(\text{H}_2\text{O})]-1$    | 0.049            | 0.161          | 0.373 | -                | -              | -     | 0.052            | 0.203          | 0.405 |
| $[\text{UO}_2(\text{pSerH}_2)_2(\text{H}_2\text{O})]-2$    | 0.048            | 0.157          | 0.370 | 0.044            | 0.145          | 0.382 | 0.052            | 0.200          | 0.404 |
| $[\text{UO}_2(\text{pSerH}_2)_2(\text{H}_2\text{O})]-3$    | -                | -              | -     | 0.045            | 0.151          | 0.399 | 0.055            | 0.213          | 0.425 |
| $[\text{UO}_2(\text{pSerH})_2(\text{H}_2\text{O})]^{2-}-1$ | -                | -              | -     | 0.058            | 0.192          | 0.511 | 0.048            | 0.186          | 0.397 |
| $[\text{UO}_2(\text{pSerH})_2(\text{H}_2\text{O})]^{2-}-2$ | 0.045            | 0.149          | 0.364 | 0.061            | 0.199          | 0.515 | 0.050            | 0.192          | 0.394 |
| $[\text{UO}_2(\text{pSerH})_2(\text{H}_2\text{O})]^{2-}-3$ | 0.048            | 0.157          | 0.371 | -                | -              | -     | 0.051            | 0.199          | 0.396 |

<sup>a</sup>The O<sub>C</sub>, O<sub>P</sub> and O<sub>W</sub> denote the oxygen atom of the carboxyl and phosphate groups and water molecule, respectively.

**Table S3.** Average U-O Bond Distances (Å), O=U=O Angles (degree) and the  $\text{UO}_2^{2+}$  Harmonic Vibrational Frequencies ( $\nu_s$  and  $\nu_{as}$ ,  $\text{cm}^{-1}$ ) for the 1:3 Type Complexes Optimized in the Aqueous Phase at the B3LYP/ECP60MWB-SEG/6-311+G(d) Level of Theory.

| complexes                               | <sup>a</sup> modes                                | U=O   | <sup>b</sup> U-O <sub>C<sub>bi</sub></sub> | <sup>b</sup> U-O <sub>P<sub>bi</sub></sub> | <sup>b</sup> U-O <sub>C<sub>m</sub></sub> | <sup>b</sup> U-O <sub>P<sub>m</sub></sub> | ∠O=U=O | $\nu_s$ | $\nu_{as}$ |
|-----------------------------------------|---------------------------------------------------|-------|--------------------------------------------|--------------------------------------------|-------------------------------------------|-------------------------------------------|--------|---------|------------|
| $[\text{UO}_2(\text{SerH})_3]^{2+}-1$   | 2C <sub>bi</sub> 1C <sub>m</sub>                  | 1.775 | 2.570                                      | -                                          | 2.321                                     | -                                         | 179.69 | 847     | 893        |
| $[\text{UO}_2(\text{SerH})_3]^{2+}-3$   | 3C <sub>bi</sub>                                  | 1.773 | 2.591                                      | -                                          | -                                         | -                                         | 179.76 | 850     | 896        |
| $[\text{UO}_2(\text{pSerH}_2)_3]^{-1}$  | 2C <sub>bi</sub> 1P <sub>m</sub>                  | 1.776 | 2.561                                      | -                                          | -                                         | 2.331                                     | 178.66 | 849     | 894        |
| $[\text{UO}_2(\text{pSerH}_2)_3]^{-2}$  | 2C <sub>bi</sub> 1C <sub>m</sub>                  | 1.776 | 2.558                                      | -                                          | 2.369                                     | -                                         | 179.38 | 849     | 890        |
| $[\text{UO}_2(\text{pSerH}_2)_3]^{-3}$  | 3C <sub>bi</sub>                                  | 1.775 | 2.568                                      | -                                          | -                                         | -                                         | 179.56 | 854     | 896        |
| $[\text{UO}_2(\text{pSerH}_2)_3]^{-4}$  | 1C <sub>bi</sub> 1P <sub>bi</sub> 1P <sub>m</sub> | 1.775 | 2.592                                      | 2.589                                      | -                                         | 2.328                                     | 178.46 | 849     | 895        |
| $[\text{UO}_2(\text{pSerH}_2)_3]^{-5}$  | 1C <sub>bi</sub> 1P <sub>bi</sub> 1C <sub>m</sub> | 1.774 | 2.549                                      | 2.596                                      | 2.328                                     | -                                         | 179.10 | 849     | 890        |
| $[\text{UO}_2(\text{pSerH}_2)_3]^{-6}$  | 2C <sub>bi</sub> 1P <sub>bi</sub>                 | 1.774 | 2.595                                      | 2.630                                      | -                                         | -                                         | 178.81 | 853     | 895        |
| $[\text{UO}_2(\text{pSerH}_2)_3]^{-7}$  | 2P <sub>bi</sub> 1P <sub>m</sub>                  | 1.773 | -                                          | 2.593                                      | -                                         | 2.336                                     | 179.11 | 854     | 902        |
| $[\text{UO}_2(\text{pSerH}_2)_3]^{-8}$  | 2P <sub>bi</sub> 1C <sub>m</sub>                  | 1.775 | -                                          | 2.591                                      | 2.342                                     | -                                         | 179.60 | 849     | 896        |
| $[\text{UO}_2(\text{pSerH}_2)_3]^{-9}$  | 1C <sub>bi</sub> 2P <sub>bi</sub>                 | 1.773 | 2.557                                      | 2.631                                      | -                                         | -                                         | 179.06 | 855     | 898        |
| $[\text{UO}_2(\text{pSerH}_2)_3]^{-10}$ | 3P <sub>bi</sub>                                  | 1.767 | -                                          | 2.643                                      | -                                         | -                                         | 179.81 | 856     | 898        |
| $[\text{UO}_2(\text{pSerH})_3]^{4-}-1$  | 2P <sub>bi</sub> 1P <sub>m</sub>                  | 1.795 | -                                          | 2.503                                      | -                                         | 2.324                                     | 179.62 | 800     | 845        |
| $[\text{UO}_2(\text{pSerH})_3]^{4-}-2$  | 2P <sub>bi</sub> 1C <sub>m</sub>                  | 1.791 | -                                          | 2.491                                      | 2.368                                     | -                                         | 179.21 | 808     | 848        |
| $[\text{UO}_2(\text{pSerH})_3]^{4-}-3$  | 1C <sub>bi</sub> 1P <sub>bi</sub> 1P <sub>m</sub> | 1.789 | 2.602                                      | 2.472                                      | -                                         | 2.275                                     | 177.59 | 809     | 856        |
| $[\text{UO}_2(\text{pSerH})_3]^{4-}-4$  | 3P <sub>bi</sub>                                  | 1.792 | -                                          | 2.563                                      | -                                         | -                                         | 179.87 | 810     | 852        |
| $[\text{UO}_2(\text{pSerH})_3]^{4-}-5$  | 1C <sub>bi</sub> 2P <sub>bi</sub>                 | 1.789 | 2.655                                      | 2.520                                      | -                                         | -                                         | 178.12 | 822     | 864        |
| $[\text{UO}_2(\text{pSerH})_3]^{4-}-6$  | 1C <sub>bi</sub> 1P <sub>bi</sub> 1C <sub>m</sub> | 1.784 | 2.570                                      | 2.467                                      | 2.359                                     | -                                         | 178.08 | 828     | 869        |
| $[\text{UO}_2(\text{pSerH})_3]^{4-}-7$  | 2C <sub>bi</sub> 1P <sub>m</sub>                  | 1.784 | 2.574                                      | -                                          | -                                         | 2.250                                     | 178.37 | 819     | 872        |
| $[\text{UO}_2(\text{pSerH})_3]^{4-}-8$  | 2C <sub>bi</sub> 1P <sub>bi</sub>                 | 1.784 | 2.597                                      | 2.483                                      | -                                         | -                                         | 178.19 | 832     | 872        |
| $[\text{UO}_2(\text{pSerH})_3]^{4-}-9$  | 2C <sub>bi</sub> 1C <sub>m</sub>                  | 1.777 | 2.565                                      | -                                          | 2.358                                     | -                                         | 179.32 | 847     | 888        |
| $[\text{UO}_2(\text{pSerH})_3]^{4-}-10$ | 3C <sub>bi</sub>                                  | 1.776 | 2.573                                      | -                                          | -                                         | -                                         | 179.80 | 850     | 892        |

<sup>a</sup>The bidentate carboxyl (C<sub>bi</sub>) and phosphate (P<sub>bi</sub>) group, the mono-dentate carboxyl (C<sub>m</sub>) and phosphate (P<sub>m</sub>) group

<sup>b</sup>The O<sub>C<sub>bi</sub></sub>, O<sub>P<sub>bi</sub></sub>, O<sub>C<sub>m</sub></sub> and O<sub>P<sub>m</sub></sub> denote the oxygen atom of the bidentate carboxyl and phosphate groups and mono-dentate carboxyl and phosphate groups, respectively.

**Table S4.** Average U-O Bond Distances (Å), O=U=O Angles (degree) and the  $\text{UO}_2^{2+}$  Harmonic Vibrational Frequencies ( $\nu_s$  and  $\nu_{as}$ ,  $\text{cm}^{-1}$ ) for the 1:4 and 1:5 Type Complexes Optimized in the Aqueous Phase at the B3LYP/ECP60MWB-SEG/6-311+G(d) Level of Theory.

| complexes                           | <sup>a</sup> modes               | U=O   | <sup>b</sup> U-O <sub>C<sub>bi</sub></sub> | <sup>d</sup> U-O <sub>C<sub>m</sub></sub> | ∠O=U=O | $\nu_s$ | $\nu_{as}$ |
|-------------------------------------|----------------------------------|-------|--------------------------------------------|-------------------------------------------|--------|---------|------------|
| $[\text{UO}_2(\text{SerH})_4]^{2+}$ | 1C <sub>bi</sub> 4C <sub>m</sub> | 1.782 | 2.604                                      | 2.386                                     | 178.90 | 832     | 879        |
| $[\text{UO}_2(\text{SerH})_5]^{2+}$ | 5C <sub>m</sub>                  | 1.782 | -                                          | 2.451                                     | 179.30 | 828     | 874        |

<sup>a</sup>The bidentate carboxyl (C<sub>bi</sub>) and mono-dentate carboxyl (C<sub>m</sub>)

<sup>b</sup>The O<sub>C<sub>bi</sub></sub> and O<sub>C<sub>m</sub></sub> denote the oxygen atom of the bidentate carboxyl and mono-dentate carboxyl group, respectively.

**Table S5.** Calculated changes of the Gibbs free energy ( $\Delta G_{\text{sol}}$ , kcal/mol) for the reactions between the uranyl Ion and the serine at the B3LYP/ECP60MWB-SEG/6-311+G(d)/SMD level of theory in the aqueous solution.

| Reactions                                                                                                                               | $\Delta G_{\text{sol}}$ |
|-----------------------------------------------------------------------------------------------------------------------------------------|-------------------------|
| $\text{SerH} + [\text{UO}_2(\text{H}_2\text{O})_5]^{2+} = [\text{UO}_2\text{SerH}(\text{H}_2\text{O})_3]^{2+} + 2\text{H}_2\text{O}$    | -10.99                  |
| $2\text{SerH} + [\text{UO}_2(\text{H}_2\text{O})_5]^{2+} = [\text{UO}_2(\text{SerH})_2(\text{H}_2\text{O})]^{2+} + 4\text{H}_2\text{O}$ | -18.78                  |
| $3\text{SerH} + [\text{UO}_2(\text{H}_2\text{O})_5]^{2+} = [\text{UO}_2(\text{SerH})_3]^{2+} + 5\text{H}_2\text{O}$                     | -20.24                  |
| $4\text{SerH} + [\text{UO}_2(\text{H}_2\text{O})_5]^{2+} = [\text{UO}_2(\text{SerH})_4]^{2+} + 5\text{H}_2\text{O}$                     | -15.67                  |
| $5\text{SerH} + [\text{UO}_2(\text{H}_2\text{O})_5]^{2+} = [\text{UO}_2(\text{SerH})_5]^{2+} + 5\text{H}_2\text{O}$                     | -4.50                   |



## Geometrical Results for the Complexes of 1:3 Uranyl Ion and Serine/Phosphoserine

The selected U-O bond distances, O=U=O bond angles for the 1:3 type complexes are listed in Table S2, SI. The U=O bond distances in the two types of complex  $[\text{UO}_2(\text{SerH})_3]^{2+}$  and  $[\text{UO}_2(\text{pSerH}_2)_3]^-$  are  $\sim 1.77 \text{ \AA}$ , which are shorter than those in the complexes  $[\text{UO}_2(\text{pSerH})_3]^{4+}$ . It can be seen that the U-O<sub>Cbi</sub> bond distances between the uranium atom and the oxygen atom of the bidentate carboxyl groups in conformer  $[\text{UO}_2(\text{SerH})_3]^{2+}$ -1 are  $2.570 \text{ \AA}$ , which are somewhat  $0.02$  longer than those of the hexa-coordinated conformers and  $[\text{UO}_2(\text{SerH})_3]^{2+}$ -2. Obviously, the distances of U-O<sub>Cbi</sub> bonds in the complexes  $[\text{UO}_2(\text{SerH})_3]^{2+}$  are  $\sim 0.30 \text{ \AA}$  longer than that of U-O<sub>Cm</sub> bond between the uranium atom and the oxygen atom of mono-dentate carboxyl group. For the 1:3 type mono-anionic phosphoserine complexes, the distances of U-O<sub>Cbi</sub> bonds are  $\sim 2.55$ - $2.60 \text{ \AA}$ , which are also longer compared to those of U-O<sub>Cm</sub> bonds. Notably, the distances of U-O<sub>Pbi</sub> bonds between the uranium atom and the oxygen atom of bidentate phosphate group are  $\sim 2.59 \text{ \AA}$  for the complexes  $[\text{UO}_2(\text{pSerH}_2)_3]^-$  with penta-coordination mode, while the corresponding values are  $\sim 2.63 \text{ \AA}$  for the complexes with hexa-coordination mode. And the distances of U-O<sub>Pbi</sub> bonds are longer compare to those of U-O<sub>Pm</sub> bonds between the uranium and the oxygen atom of the mono-dentate phosphate group. For the 1:3 type dianionic phosphoserine complexes, the distances of U-O<sub>Cbi</sub> bonds have obvious difference, with the longest and shortest bond distance of  $2.655$  and  $2.565 \text{ \AA}$  in the conformers  $[\text{UO}_2(\text{pSerH})_3]^{4-}$ -5 and  $[\text{UO}_2(\text{pSerH})_3]^{4-}$ -9, respectively. Obviously, the distances of U-O<sub>Cbi</sub> bonds are somewhat longer compared to those of U-O<sub>Pbi</sub> bonds in the 1:3 type

complexes  $[\text{UO}_2(\text{pSerH})_3]^{4-}$ . It can be seen that the distances of  $\text{U-O}_{\text{Cm}}$  bonds are  $\sim 2.36 \text{ \AA}$ , while those of  $\text{U-O}_{\text{Pm}}$  bonds decrease with the decreasing number of bidentate phosphate groups in the complexes  $[\text{UO}_2(\text{pSerH})_3]^{4-}$ . For example, the distance of  $\text{U-O}_{\text{Pm}}$  bond is  $2.324 \text{ \AA}$  in conformer  $[\text{UO}_2(\text{pSerH})_3]^{4-}$ -1 with two bidentate phosphate groups, and the corresponding value decreases to  $2.275 \text{ \AA}$  in conformer  $[\text{UO}_2(\text{pSerH})_3]^{4-}$ -3 with a bidentate phosphate and carboxyl group, it changes to  $2.250 \text{ \AA}$  in conformer  $[\text{UO}_2(\text{pSerH})_3]^{4-}$ -9 without bidentate phosphate group. It is worthy to notice that the distances of  $\text{U-O}_{\text{Pbi}}$  and  $\text{U-O}_{\text{Pm}}$  bonds in the complexes  $[\text{UO}_2(\text{pSerH})_3]^{4-}$  are somewhat shorter than those in the complexes  $[\text{UO}_2(\text{pSerH}_2)_3]^-$ , which also indicates that the binding affinity of  $-\text{PO}_4^{2-}$  group toward the uranyl ion is stronger than that of  $-\text{PO}_4\text{H}^-$  group. Additionally, compared to the 1:1 and 1:2 type complexes, the  $\text{O}=\text{U}=\text{O}$  angles in all the 1:3 type complexes are even more close to linearity with the maximum disparity of  $2.4^\circ$  for conformer  $[\text{UO}_2(\text{pSerH})_3]^{4-}$ -3.
